# Supplementary material for: Effects of vitamin D supplementation on the outcomes of patients with pulmonary tuberculosis: a systematic review and meta-analysis
Source: PubMed Central journal article supplement (PMC6025740; doi:10.1186/s12890-018-0677-6), 2018-06-28

| Study or Subgroup                                                                  | Experimental |            | Control |            | Weight        | Odds Ratio         |                     |
|------------------------------------------------------------------------------------|--------------|------------|---------|------------|---------------|--------------------|---------------------|
|                                                                                    | Events       | Total      | Events  | Total      |               | M-H, Fixed, 95% CI | M-H, Fixed, 95% CI  |
| Daley 2015                                                                         | 3            | 101        | 1       | 110        | 3.4%          | 3.34               | [0.34, 32.61]       |
| Ganmaa 2017                                                                        | 0            | 190        | 5       | 200        | 19.8%         | 0.09               | [0.01, 1.70]        |
| Martineau 2011                                                                     | 1            | 62         | 1       | 64         | 3.6%          | 1.03               | [0.06, 16.88]       |
| Mily 2015                                                                          | 0            | 72         | 0       | 72         |               | Not estimable      |                     |
| Salahuddin 2013                                                                    | 2            | 132        | 1       | 127        | 3.7%          | 1.94               | [0.17, 21.65]       |
| Tukvadze 2015                                                                      | 0            | 100        | 1       | 99         | 5.6%          | 0.33               | [0.01, 8.12]        |
| Wejse 2009                                                                         | 30           | 187        | 20      | 178        | 63.8%         | 1.51               | [0.82, 2.77]        |
| <b>Total (95% CI)</b>                                                              |              | <b>844</b> |         | <b>850</b> | <b>100.0%</b> | <b>1.22</b>        | <b>[0.74, 2.04]</b> |
| Total events                                                                       | 36           |            | 29      |            |               |                    |                     |
| Heterogeneity: $\text{Chi}^2 = 5.03$ , $\text{df} = 5$ ( $P = 0.41$ ); $I^2 = 1\%$ |              |            |         |            |               |                    |                     |
| Test for overall effect: $Z = 0.78$ ( $P = 0.43$ )                                 |              |            |         |            |               |                    |                     |

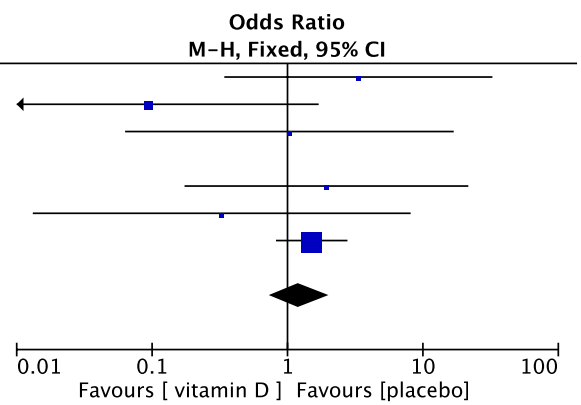

Supplement: 12890_2018_677_MOESM12_ESM.pdf [file 12890_2018_677_MOESM12_ESM.pdf]
