# Supplementary material for: Effects of vitamin D supplementation on the outcomes of patients with pulmonary tuberculosis: a systematic review and meta-analysis
Source: PubMed Central journal article supplement (PMC6025740; doi:10.1186/s12890-018-0677-6), 2018-06-28
Supplement: 12890_2018_677_MOESM2_ESM.pdf [file 12890_2018_677_MOESM2_ESM.pdf]

|                 | Random sequence generation (selection bias) | Allocation concealment (selection bias) | Blinding of participants and personnel (performance bias) | Blinding of outcome assessment (detection bias) | Incomplete outcome data (attrition bias) | Selective reporting (reporting bias) | Other bias |
|-----------------|---------------------------------------------|-----------------------------------------|-----------------------------------------------------------|-------------------------------------------------|------------------------------------------|--------------------------------------|------------|
| Daley 2015      | +                                           | +                                       | +                                                         | +                                               | ?                                        | +                                    | +          |
| Ganmaa 2017     | +                                           | +                                       | +                                                         | +                                               | +                                        | +                                    | +          |
| Martineau 2011  | +                                           | +                                       | +                                                         | +                                               | +                                        | +                                    | +          |
| Mily 2015       | +                                           | +                                       | +                                                         | +                                               | +                                        | +                                    | +          |
| Nursyam 2006    | ?                                           | +                                       | ?                                                         | ?                                               | +                                        | +                                    | +          |
| Salahuddin 2013 | +                                           | +                                       | ?                                                         | ?                                               | +                                        | +                                    | +          |
| Tukvadze 2015   | +                                           | +                                       | +                                                         | +                                               | ?                                        | +                                    | +          |
| Wejse 2009      | +                                           | +                                       | +                                                         | +                                               | ?                                        | +                                    | +          |
