# Supplementary material for: Effects of vitamin D supplementation on the outcomes of patients with pulmonary tuberculosis: a systematic review and meta-analysis
Source: PubMed Central journal article supplement (PMC6025740; doi:10.1186/s12890-018-0677-6), 2018-06-28

| Study or Subgroup                                                                   | Experimental |            | Control |            | Weight        | Odds Ratio<br>M-H, Fixed, 95% CI |
|-------------------------------------------------------------------------------------|--------------|------------|---------|------------|---------------|----------------------------------|
|                                                                                     | Events       | Total      | Events  | Total      |               |                                  |
| Daley 2015                                                                          | 4            | 101        | 2       | 110        | 6.0%          | 2.23 [0.40, 12.43]               |
| Martineau 2011                                                                      | 37           | 71         | 32      | 70         | 50.1%         | 1.29 [0.67, 2.50]                |
| Wejse 2009                                                                          | 10           | 157        | 14      | 147        | 43.9%         | 0.65 [0.28, 1.50]                |
| <b>Total (95% CI)</b>                                                               |              | <b>329</b> |         | <b>327</b> | <b>100.0%</b> | <b>1.06 [0.65, 1.74]</b>         |
| Total events                                                                        | 51           |            | 48      |            |               |                                  |
| Heterogeneity: $\text{Chi}^2 = 2.38$ , $\text{df} = 2$ ( $P = 0.30$ ); $I^2 = 16\%$ |              |            |         |            |               |                                  |
| Test for overall effect: $Z = 0.25$ ( $P = 0.80$ )                                  |              |            |         |            |               |                                  |

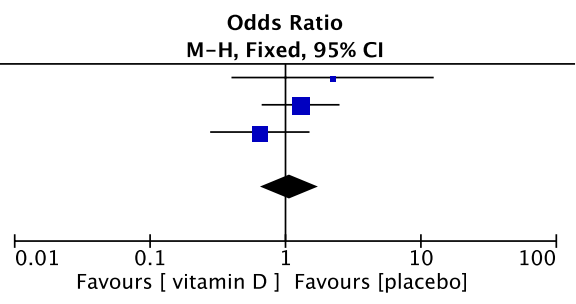

Supplement: 12890_2018_677_MOESM10_ESM.pdf [file 12890_2018_677_MOESM10_ESM.pdf]
