# Supplementary material for: Effects of vitamin D supplementation on the outcomes of patients with pulmonary tuberculosis: a systematic review and meta-analysis
Source: PubMed Central journal article supplement (PMC6025740; doi:10.1186/s12890-018-0677-6), 2018-06-28

| Study or Subgroup                                                                   | Experimental |            | Control |            | Weight        | Odds Ratio<br>M-H, Fixed, 95% CI |
|-------------------------------------------------------------------------------------|--------------|------------|---------|------------|---------------|----------------------------------|
|                                                                                     | Events       | Total      | Events  | Total      |               |                                  |
| Daley 2015                                                                          | 3            | 101        | 2       | 110        | 14.4%         | 1.65 [0.27, 10.10]               |
| Ganmaa 2017                                                                         | 1            | 190        | 5       | 200        | 37.5%         | 0.21 [0.02, 1.78]                |
| Martineau 2011                                                                      | 7            | 71         | 2       | 70         | 14.0%         | 3.72 [0.74, 18.57]               |
| Mily 2015                                                                           | 0            | 62         | 1       | 64         | 11.3%         | 0.34 [0.01, 8.47]                |
| Tukvadze 2015                                                                       | 2            | 100        | 3       | 99         | 22.8%         | 0.65 [0.11, 4.00]                |
| Wejse 2009                                                                          | 0            | 187        | 0       | 178        |               | Not estimable                    |
| <b>Total (95% CI)</b>                                                               |              | <b>711</b> |         | <b>721</b> | <b>100.0%</b> | <b>1.02 [0.48, 2.20]</b>         |
| Total events                                                                        | 13           |            | 13      |            |               |                                  |
| Heterogeneity: $\text{Chi}^2 = 5.55$ , $\text{df} = 4$ ( $P = 0.24$ ); $I^2 = 28\%$ |              |            |         |            |               |                                  |
| Test for overall effect: $Z = 0.06$ ( $P = 0.95$ )                                  |              |            |         |            |               |                                  |

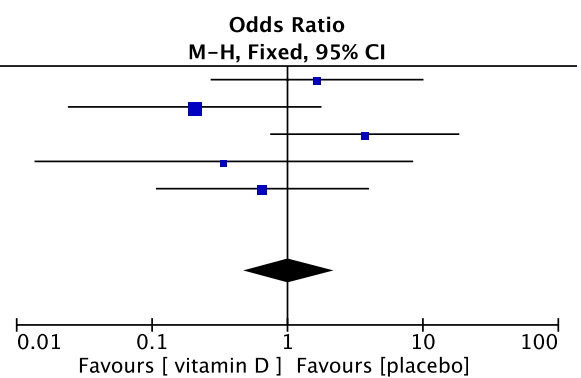

Supplement: 12890_2018_677_MOESM11_ESM.pdf [file 12890_2018_677_MOESM11_ESM.pdf]
