# Supplementary material for: Effects of vitamin D supplementation on the outcomes of patients with pulmonary tuberculosis: a systematic review and meta-analysis
Source: PubMed Central journal article supplement (PMC6025740; doi:10.1186/s12890-018-0677-6), 2018-06-28

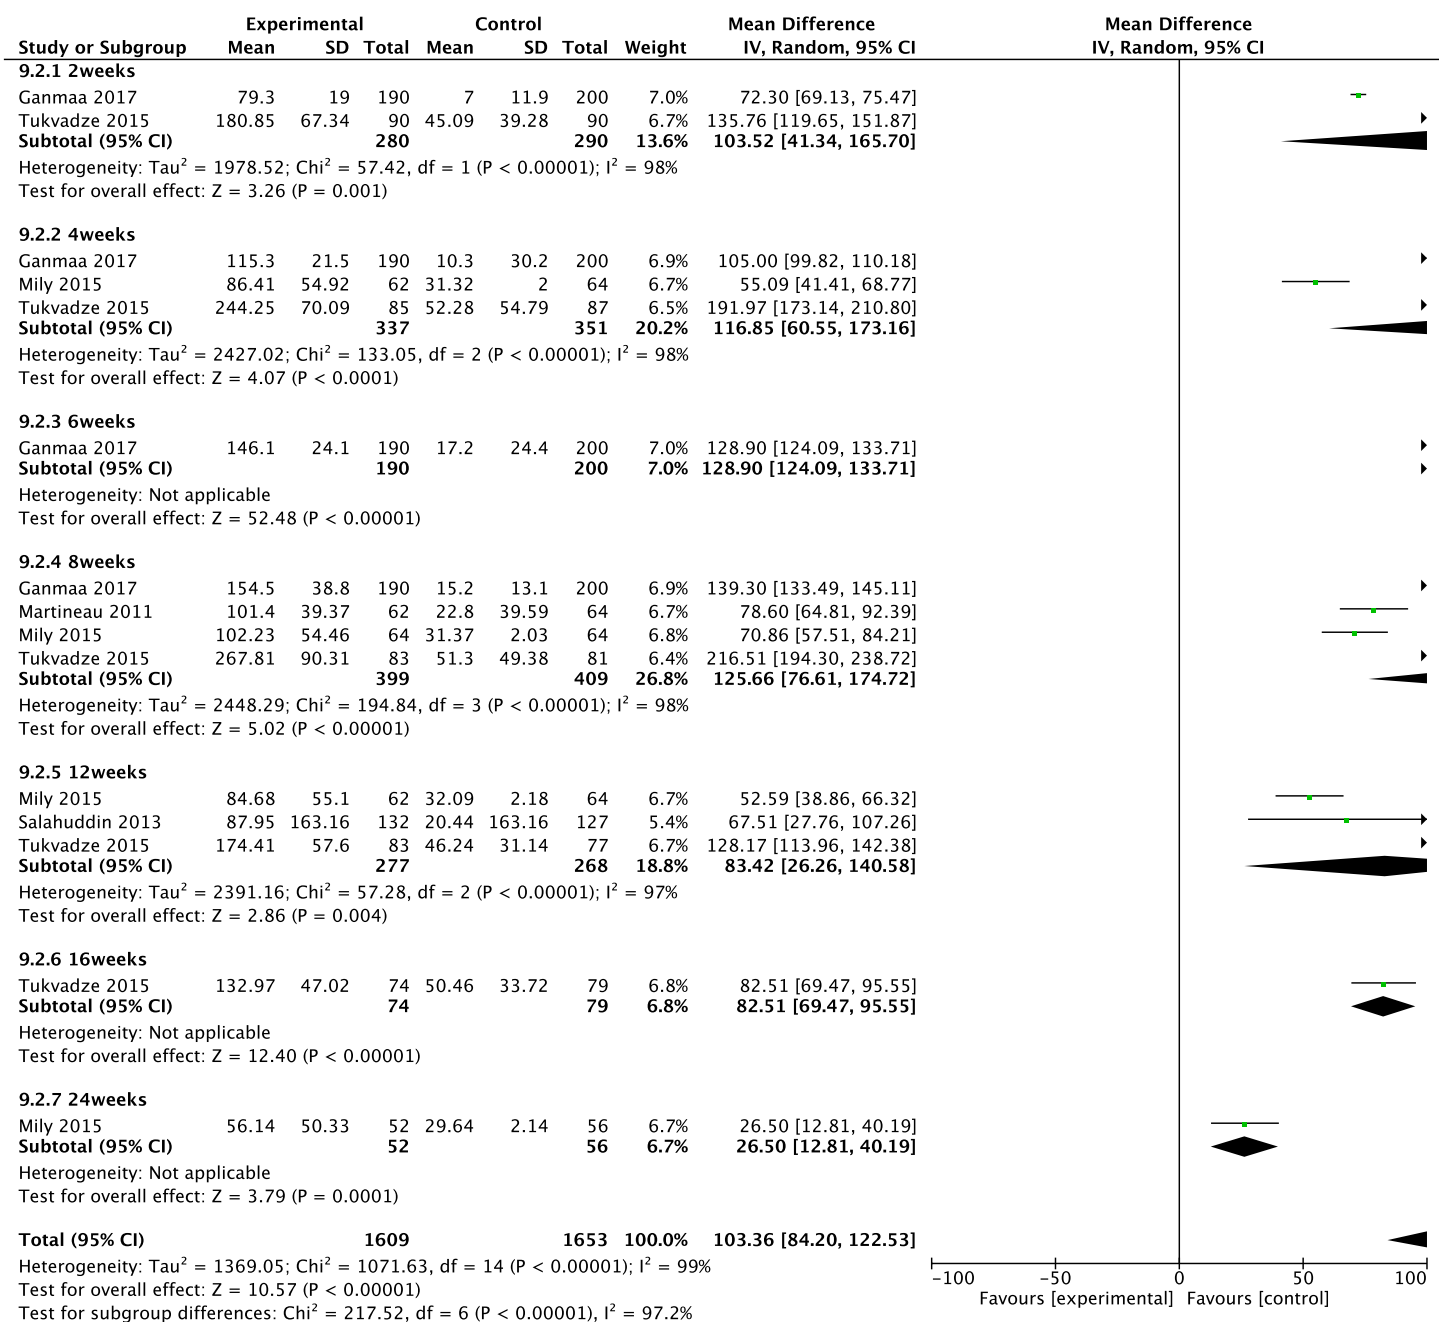

Supplement: 12890_2018_677_MOESM13_ESM.pdf [file 12890_2018_677_MOESM13_ESM.pdf]
