# Supplementary material for: Effects of vitamin D supplementation on the outcomes of patients with pulmonary tuberculosis: a systematic review and meta-analysis
Source: PubMed Central journal article supplement (PMC6025740; doi:10.1186/s12890-018-0677-6), 2018-06-28

| Study or Subgroup     | Experimental |       |            | Control |       |            | Weight        | Std. Mean Difference<br>IV, Random, 95% CI | Std. Mean Difference<br>IV, Random, 95% CI |
|-----------------------|--------------|-------|------------|---------|-------|------------|---------------|--------------------------------------------|--------------------------------------------|
|                       | Mean         | SD    | Total      | Mean    | SD    | Total      |               |                                            |                                            |
| Ganmaa 2017           | 20.7         | 3.1   | 190        | 21.2    | 3.3   | 200        | 21.9%         | -0.16 [-0.35, 0.04]                        |                                            |
| Martineau 2011        | 21.29        | 2.72  | 62         | 21.18   | 2.75  | 64         | 14.9%         | 0.04 [-0.31, 0.39]                         |                                            |
| Mily 2015             | 47           | 9.5   | 62         | 45.6    | 7.7   | 64         | 14.8%         | 0.16 [-0.19, 0.51]                         |                                            |
| Nursyam 2006          | 17.88        | 1.79  | 34         | 18.77   | 2.47  | 33         | 10.3%         | -0.41 [-0.89, 0.08]                        |                                            |
| Salahuddin 2013       | 3.75         | 3.28  | 119        | 2.61    | 3.45  | 119        | 19.1%         | 0.34 [0.08, 0.59]                          |                                            |
| Wejse 2009            | 53.15        | 38.47 | 125        | 48.31   | 38.47 | 109        | 19.0%         | 0.13 [-0.13, 0.38]                         |                                            |
| <b>Total (95% CI)</b> |              |       | <b>592</b> |         |       | <b>589</b> | <b>100.0%</b> | <b>0.04 [-0.15, 0.24]</b>                  |                                            |

Heterogeneity: Tau<sup>2</sup> = 0.04; Chi<sup>2</sup> = 13.10, df = 5 (P = 0.02); I<sup>2</sup> = 62%  
Test for overall effect: Z = 0.42 (P = 0.68)

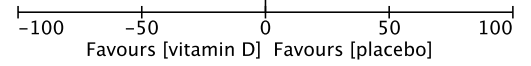

Supplement: 12890_2018_677_MOESM17_ESM.pdf [file 12890_2018_677_MOESM17_ESM.pdf]
